# Supplementary material for: House spider genome uncovers evolutionary shifts in the diversity and expression of black widow venom proteins associated with extreme toxicity
Source: PubMed Central journal article supplement (PMC5314461; doi:10.1186/s12864-017-3551-7), 2017-02-16
Supplement: 12864_2017_3551_MOESM5_ESM.pdf [file 12864_2017_3551_MOESM5_ESM.pdf]

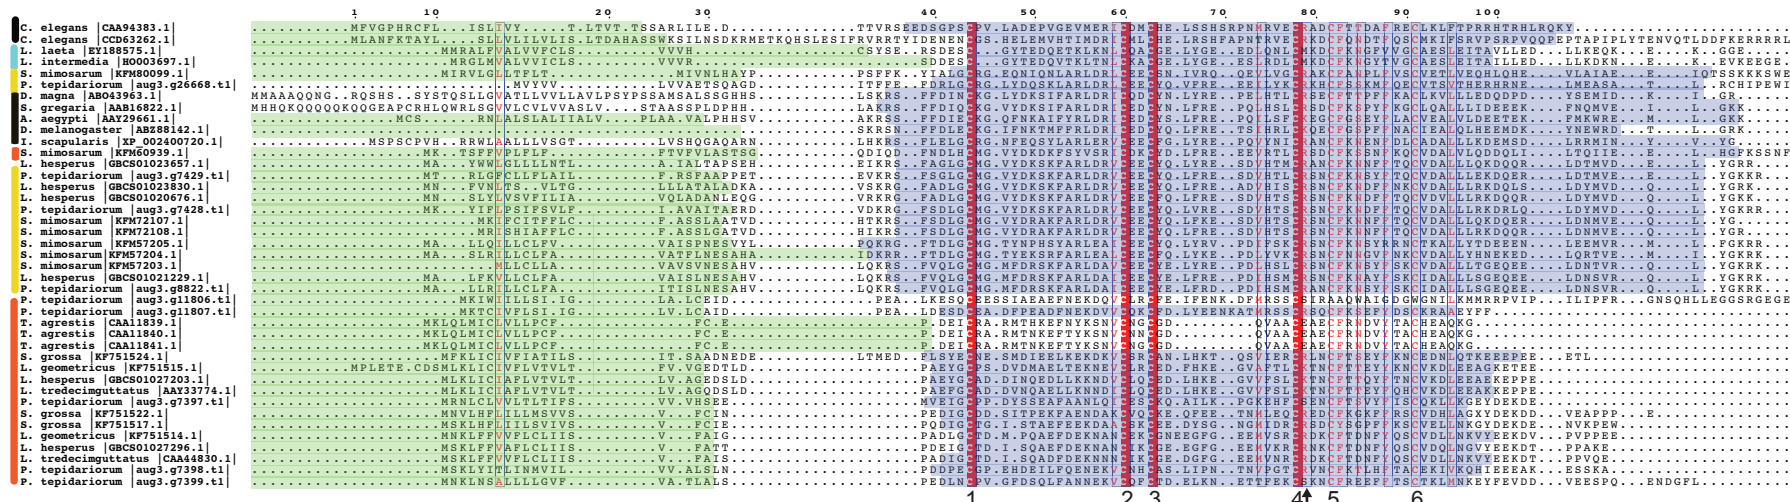

Signal peptide  
 CHH domain

- Venom expressed (TPM>100 in *P. tepidariorum*, *L. hesperus*, *S. mimosarum* venom glands; abundant in *L. geometricus* and *S. grossa* venom gland EST library; or known venom protein)
- Undetermined venom expression (from a venom gland EST database with no abundance estimates)
- Negligible/ No Venom Expression (TPM <2)
- From animal that does not produce venom

**Additional File 5: Alignment of CCH/ITP/Iatrotoxin homologs shows that duplication and truncation events are associated with a shift to venom gland expression.** All CCH/ITP/Iatrotoxin sequences from *P. tepidariorum* with one exception (aug3.g11806) contain six conserved cysteine residues. The location of a conserved phase 2 intron interrupting the codon following the fourth conserved cysteine residue in each sequence is shown. Levels of venom expression for each sequence is marked by color coded bar on left, with key below. Signal peptides are shaded in green, while CHH domains are shaded purple.
